# Supplementary material
Source: PubMed Central journal article supplement (PMC3580314)
Supplement: NIHMS51833-supplement-01.pdf [file NIHMS51833-supplement-01.pdf]

## SUPPLEMENTARY ONLINE DATA

# Distinctive properties of *Arabidopsis* SUMO paralogues support the *in vivo* predominant role of AtSUMO1/2 isoforms

Laura CASTAÑO-MIQUEL, Josep SEGUÍ and L. Maria LOIS<sup>1</sup>

Department of Molecular Genetics, Center for Research in Agricultural Genomics (CRAG) CSIC-IRTA-UAB, Parc de Recerca UAB, Edifici CRAG, Campus UAB, 08193 Bellaterra, Barcelona, Spain

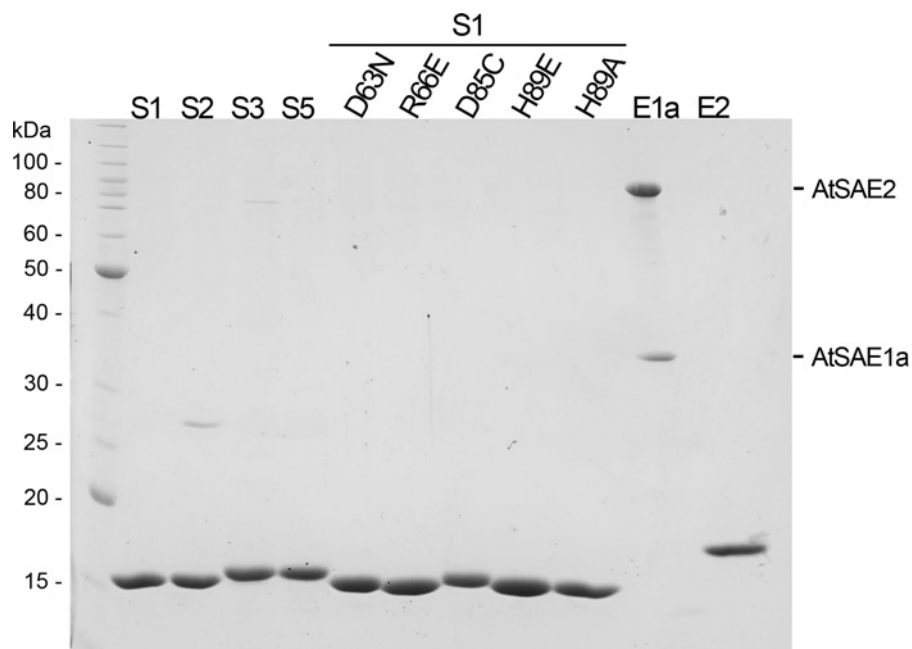

**Figure S1 Purification from *E. coli* (DE3) BL21 of the SUMO conjugation machinery components**

Purified protein sample (2  $\mu$ g of each) was analysed SDS/PAGE (12% gel) and stained with Coomassie Blue.

<sup>1</sup> To whom correspondence should be addressed (email maria.lois@cid.csic.es).

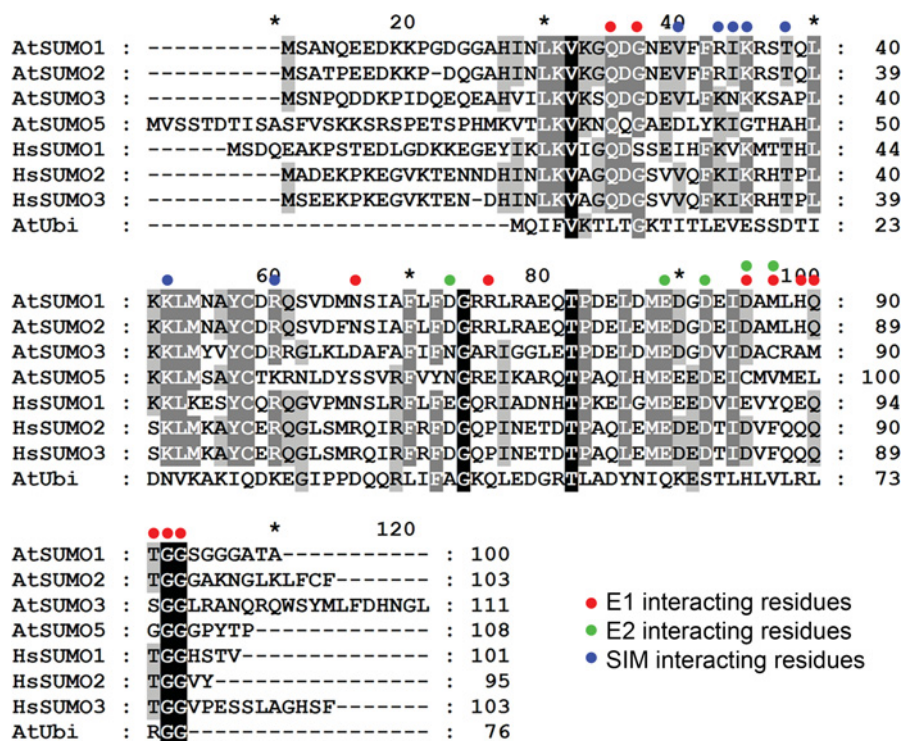

**Figure S2** Sequence alignment of *Arabidopsis* (At) and human (Hs) SUMO orthologues and *Arabidopsis* ubiquitin (AtUbi)

Dots above the alignment indicate residues involved in E1 contacts (red), E2 non-covalent interactions (green) and interaction with SIMs (blue).

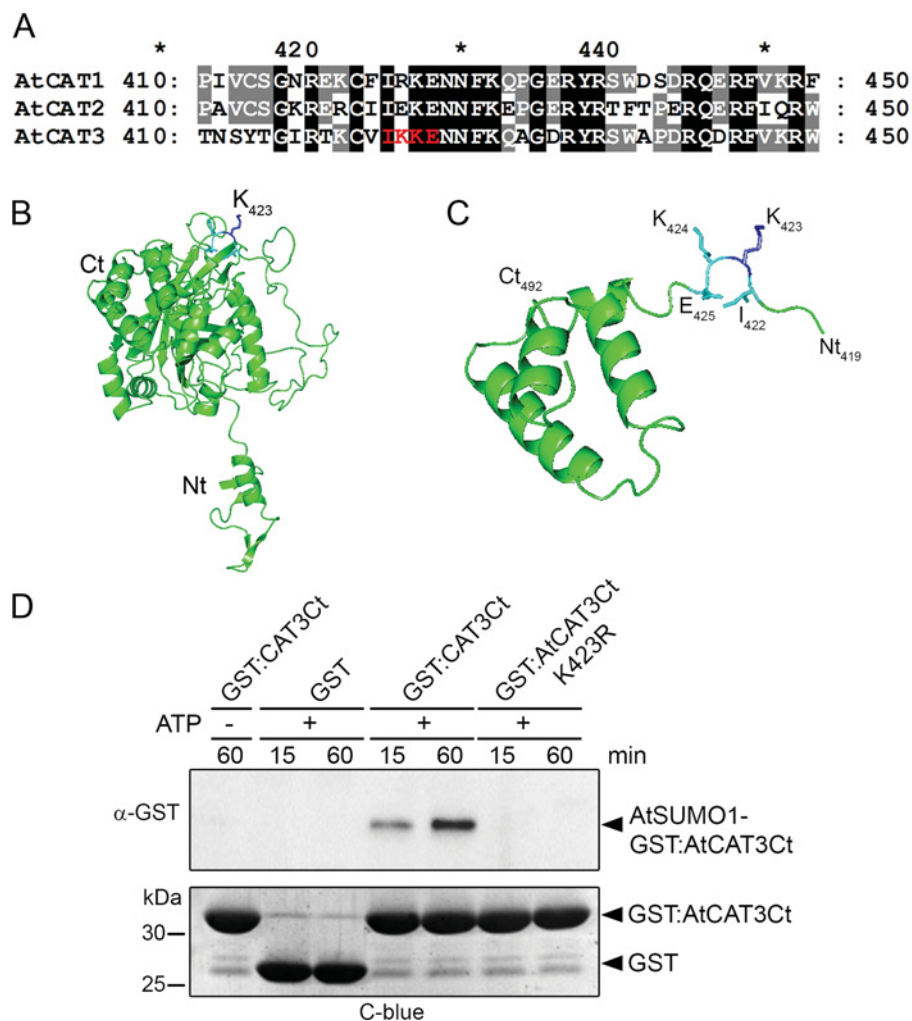

**Figure S3** *In vitro*-specific SUMOylation of the AtCAT3 C-terminal domain

(A) Protein sequence alignment of the three *Arabidopsis* catalase isoform regions containing the predicted SUMOylation consensus site, which is shown in red. (B) AtCAT3 structure as predicted by the SWISS-MODEL comparative protein modelling server (shown as a green ribbon). *Exiguobacterium oxidotolerans* catalase structure was used as a template (PDB code 2J2M). (C) Structure model of the AtCAT3 C-terminal domain (comprising amino acids 419–492) used as a GST-fusion protein in the *in vitro* SUMOylation assays. A lateral chain of amino acids in the SUMOylation consensus site is represented by sticks: dark blue for the acceptor lysine (Lys<sup>423</sup>) and light blue for the others (Iso<sup>422</sup>, Lys<sup>424</sup> and Glu<sup>425</sup>). (D) *In vitro* SUMOylation assays were performed in the presence of AtE1a, AtSUMO2, AtSCE1 and the corresponding substrate. Incubation was performed at 227 °C and stopped at the specified time points. Reaction products were resolved by SDS/PAGE and examined by immunoblot analysis with anti-GST antibodies. The portion of the Coomassie Blue (C-Blue)-stained membrane that corresponds with the GST substrates is shown as a loading control.
